# Supplementary material for: Phylogenetic Analysis of Zebrafish Basic Helix-Loop-Helix Transcription Factors
Source: Springer Nature journal article supplement (doi:10.1007/s00239-009-9232-7), 2009-05-15
Supplement: MOESM2 [file 239_2009_9232_MOESM2_ESM.docx]

**List of chicken bHLH members**

The amino acid sequences of 104 chicken (*Gallus gallus*) bHLH motifs are listed in FASTA data format. All bHLH members are in the order of bHLH families manifested in Table 1 of Ledent et al (2002). Each bHLH name is followed by its protein or EST (expressed sequence tag) accession number in the brackets. All protein sequences can be retrieved in NCBI website ([www.ncbi.nlm.nih.gov](http://www.ncbi.nlm.nih.gov/)) except those numbered beginning with “hmm” which were from database of ‘Ab initio protein’. These protein sequences should be accessed on webpage of chicken genome map view (<http://www.ncbi.nlm.nih.gov/mapview/map_search.cgi?taxid=9031>).

>Gash1 (NP_989743.1)

AVARRNERERNRVKLVNLGFATLREHVPNGAANKKMSKVETLRSAVEYIRALQ

>Gash2 (NP_990280.1)

AVARRNERERNRVRLVNLGFAALRQHVPHGTASKKLSKVETLRSAVEYIRALQ

>Gash3a (XP_001232099.1)

FIRKRNERERQRVKCVNEGYAKLRHHLPKEYLEKRLSKVETLRAAIKYIRYLQ

>Gash3c (XP_425485.1)

FIRKRNERERQRVRCVNEGYTRLREHLPKEFADKRLSKVETLRAAINYIKHLQ

>Myf3 (NP_989545.1)

RRKAATMRERRRLSKVNEAFETLKRCTSTNPNQRLPKVEILRNAIRYIESLQ

>Myf4 (NP_989515.1)

RRRAATLREKRRLKKVNEAFEALKRSTLLNPNQRLPKVEILRSAIQYIERLQ

>Myf5 (NP_001025534.1)

RRKAATMRERRRLKKVNQAFETLKRCTTANPNQRLPKVEILRNAIRYIESLQ

>Myf6 (NP_001025917.1)

RRKAATLRERRRLKKINEAFEALKRRTVANPNQRLPKVEILRSAISYIERLQ

>TF12 (NP_990706.2)

RRMANNARERLRVRDINEAFKELGRMCQLHLKSEKPQTKLLILHQAVAVILSLE

>E2A (hmm9164)

RRMANNARERVRVRDINEAFKELGRMCQMHLKTDKAQTKLIILQQAVQVILGLE

>TCF3 (NP_989817.2)

RRVANNARERLRVRDINEAFKELGRMCQLHLNSEKPQTKLLILHQAVSVILNLE

>Gath4a (NP_990127.1)

RRLKANNRERNRMHNLNAALDALRDCVPTFPEDAKLTKIETLRFAHNYIWALT

>Gath4c (NP_990214.1)

RRVKANDRERNRMHHLNAALDELRSVLPTFPDDTKLTKIETLRFAYNYIWALS

>NDF1 (NP_990251.1)

RRMKANARERNRMHGLNAALDNLRKVVPCYSKTQKLSKIETLRLAKNYIWALS

>NDF2_EST_CN230957.1)

RRQKANARERNRMHDLNAALDNLRKVVPCYSKTQKLSKIETLRLAKNYIWALS

>Gath2 (XP_418852.1)

RRQEANARERNRMHGLNDALDNLRKVVPCYSKTQKLSKIETLRLAKNYIWALS

>Gath3 (NP_990407.1)

RRVKANARERTRMHGLNDALDNLRRVMPCYSKTQKLSKIETLRLARNYIWALS

>Gath1 (hmm54472)

XXXAANAQKQRRMHVLNHAFDQLRNVIPSFNNDKKLSKYETLQMAQIYISALA

>Gath5 (NP_989999.1)

RRLAANARERRRMQGLNTAFDRLRKVVPQWGQDKKLSKYETLQMALSYIMALT

>Mist1 (XP_425228.1)

RRLESNERERQRMHKLNNAFQALREVIPHVRAENKLSKIETLTLAKNYIKSLT

>Beta3a (NP_989834.1)

LRLNINARERRRMHDLNDALDELRAVIPYAHSPSVRKLSKIATLLLAKNYILMQA

>Beta3b (NP_989835.1)

LRLSINARERRRMHDLNDALDGLRSVIPYAHSPSVRKLSKIATLLLAKNYILMQA

>Oligo2 (EST_AL588004.1)

LRLKINSRERKRMHDLNIAMDGLREVMPYAHGPSVRKLSKIATLLLARNYILMLT

>Oligo3 (XP_001232806.1)

LRLKINGRERKRMHDLNLAMDGLREVMPYAHGPSVRKLSKIATLLLARNYILMLT

>Gath6 (EST_BU109892.1)

RRLLANARERTRVHTISAAFEALRKQVPCYSYGQKLSKLAILRIACNYILSLA

>Mesp1 (hmm11657)

PRQSASEREKLRMRRLAQAMHRLRHYLPPTLAPAGQSLTKIETLRLATRYIAHLS

>Mesp2 (NP_989897.1)

PRQSASEREKLRMRRLAQAMHRLRHYLPPALAPAGQSLTKIETLRLATRYIAHLS

>pMeso1 (NP_990015.1)

RRRKASEREKLRMRTLADALHTLRNYLPPAYSQRGQPLTKIQTLKCTIKYISELT

>Twist (NP_990070.1)

QRVMANVRERQRTQSLNEAFAALRKIIPTLPSDKLSKIQTLKLAARYIDFLY

>Dermo1 (NP_990010.1)

QRILANVRERQRTQSLNEAFAALRKIIPTLPSDKLSKIQTLKLAARYIDFLY

>Twist3 (XP_424492.1)

QRVIANVRERQRTQSLNDAFAELRKIIPTLPSDKLSKIQTLKLAARYIDFLY

>Paraxis (XP_001234790.1)

PAHAHPLRAVPTHSVNTAFGALRTLIPTEPADRKLSKVETLRLASSYISHLA

>Sclerax (NP_989584.1)

QRHTANARERDRTNSVNTAFTALRTLIPTEPADRKLSKIETLRLASSYISHLG

>MyoRa1 (XP_418293.2)

QRNAANARERARMRVLSKAFSRLKTSLPWVPPDTKLSKLDTLRLASSYIAHLR

>MyoRa2 (XP_419734.1)

QRNAANARERARMRVLSKAFSRLKTTLPWVPPDTKLSKLDTLRLASSYIAHLR

>MyoRb1 (XP_427081.2)

PAAANAARERSRVQTLRHAFLELQKTLPSVPPDTKLSKLDVLLLATTYIAHLT

>dHand (NP_990297.1)

RRGTANRKERRRTQSINSAFAELRECIPNVPADTKLSKIKTLRLATSYIAYLM

>PTFa (EST_BU485278.1)

LRQAANVRERRRVQSINDAFEGLRSHIPTLPYEKRLSKVDTLRLAIGYINFLS

>PTFb1 (XP_425989.1)

QRQAANIRERKRMFNLNEAFDQLRKKVPTFAYEKRLSRIETLRLAIVYISFMT

>PTFb2 (XP_001234487.1)

HRRAANVRERKRMLSINSAFDQLRCHVPTFPYEKRLSKIDTLRLAIAYIALLG

>Tal1 (NP_990683.1)

RRIFTNSRERWRQQNVNGAFAELRKLIPTHPPDKKLSKNEILRLAMKYINFLA

>Tal2 (XP_424886.1)

RKIFTNTRERWRQQNVNSAFAKLRKLIPTHPPDKKLSKNETLRLAMRYINFLV

>NSCL1 (NP_989452.1)

YRTAHATRERIRVEAFNMAFAELRKLLPTLPPDKKLSKIEILRLAICYISYLN

>NSCL2 (NP_990128.1)

YRSAHATRERIRVEAFNLAFAELRKLLPTLPPDKKLSKIEILRLAICYISYLN

>SRC1 (NP_001012900.1)

PCDTAQSNEKRRREQENKYLEELAELLSANIGDIDTLSVKPDKCKILKKTVDQIQQMK

>SRC2 (XP_001231617.1)

GPSPKRSTEKRNREQENKYIEELAELIFANFNDIDNFNFKPDKCAILKETVKQIRQIK

>SRC3 (XP_417385.2)

GASLTCSGEKRRREQESKYIEELAELISANLSDIDNFNVKPDKCAILKETVRQIRQIK

>N-Myc (NP_001026262.1)

RRRNHNILERQRRNDLRSSFLTLRDHVPELVKNEKAAKVVILKKATEYVHSLQ

>C-Myc (NP_001026123.1)

KRRTHNVLERQRRNELKLSFFALRDQIPEVANNEKAPKVVILKKATEYVLSIQ

>L-Myc (XP_425790.1)

KRKNHNYLERKRRNDLRSRFLALRDQVPGLASCPKTPKVVILSKSSEYLQSLI

>Mxi1 (hmm12481)

NRSTHNELEKNRRAHLRLCLERLKVLIPLGPDCTRHTTLGLLNKAKAHIKKLE

>Mad1 (NP_001034399.1)

GRSTHNEMEKNRRAHLRLCLEKLKVLVPLGPESSKHTTLSLLMKAKLHIKKLE

>Mad4 (NP_001006460.1)

NRSSHNELEKHRRAKLRLYLEQLKQLVPLGPDSTRHTTLSLLKRAKMHIKKLE

>Mnt (XP_425414.2)

TREVHNKLEKNRRAHLKECFETLKRNIPNVDDKKTSNLSVLRSALRYIQTLK

>Max (EST_CN220429.1)

KRAHHNALERKRRDHIKDSFHSLRDSVPSLQGEKASRAQILDKATEYIQYMR

>USF1 (NP_001007486.1)

RRAQHNEVERRRRDKINNWIVQLSKIIPDCSMENTKSGQSKGGILSKACDYIQELR

>USF2 (EST_BG709819.1)

RRAQHNEVERRRRDKINNWIVQLSKIIPDCNADNSKTGASKGGILSKACDYVRELR

>MITF (NP_990360.1)

KKDNHNLIERRRRFNINDRIKELGTLIPKSNDPDMRWNKGTILKASVDYIRKLQ

>TFEb (NP_001026093.1)

KKDNHNLIERRRRFNINDRIKELGMLIPKANDLDVRWNKGTILKASVDYIKRMQ

>TFEc (NP_001006229.1)

KKDNHNLIERRRRYNINYRIKELGTLIPKSNDPDMRWNKGTILKASVEYIKWLQ

>SREBP1 (NP_989457.1)

KRTAHNAIEKRYRSSINDKIVELKDLVVGTEAKLNKSAILRKAIEYIRFLQ

>SREBP2 (XP_416222.2)

RRTTHNIIEKRYRSSINDKIIELKDLIMGTDAKMHKSGVLRKAIDYIKYLQ

>Mlx (NP_001104311.1)

RRITHISAEQKRRFNIKLGFDTLHSLVSTLSAQPSIKVSKATTLQKTAEYICKLQ

>MondoA (hmm54830)

QRMKRTSSEQKRRFNIRIGCSILNSLVSVNSKLISHAITLQKTVEYIAKLQ

>TF4 (EST_DR429279.1)

RRRAHTQAEQKRRNAIKKGYDDLQAIVPTCQQQDFSISSQKLSKAIILQKTIDYIQFLH

>Clock (NP_989505.2)

KRVSRNKSEKKRRDQFNVLIKELGSMLPGNARKMDKSTVLQKSIDFLRKHK

>NPAS2a (NP_001025713.1)

KRASRNKSEKKRRDQFNVLIKELSSMLPGNTRKMDKTTVLEKVIGFLQKHN

>NPAS2b (XP_420353.2)

KRASRNKSEKKRRDQFNVLIKELCTMLQGHGHPLKMDKSTILQRTIDFLQKQK

>ARNT1 (NP_989531.1)

ARENHSEIERRRRNKMTAYITELSDMVPTCSALARKPDKLTILRMAVSHMKSLR

>ARNT2 (XP_413854.2)

SRENHSEIERRRRNKMTQYITELSDMVPTCSALARKPDKLTILRMAVSHMKSMR

>Bmal1 (NP_001001463.1)

AREAHSQIEKRRRDKMNSFIDELASLVPTCNAMSRKLDKLTVLRMAVQHMKTLR

>Bmal2 (NP_989464.1)

FREAHSQTEKRRRDKMNNLIEELSAMIPQCNPMARKLDKLTVLRMAVQHLKSLK

>AHR1 (NP_989449.1)

AEGVKSNPSKRHRDRLNAELDRLASLLPFPQDVIAKLDKLSVLRLSVSYLRAKS

>AHR2 (hmm46108)

AGNEKSNPSKRHRDRLNAELDHLASLLPFPPDIISKLDKLSVLRLSVSYLRVKS

>AHR3 (hmm34307)

ADSGRSNPSKRHRERLNRELERLAALLPFPEEVAAGLDKLSILRLSAAFLRAKS

>AHR4 (hmm34113)

PEGVKSNPSKRHRDRLNEELNKLTGLLPFPEDACTRFDKLSTLRLAVGYLKVKN

>Sim1 (XP_419817.2)

MKEKSKNAARTRREKENSEFYELAKLLPLPSAITSQLDKASIIRLTTSYLKMRV

>Sim2 (XP_416724.2)

MKEKSKNAAKTRREKENGEFYELAKLLPLPSAITSQLDKASIIRLTTSYLKMRA

>Sim3 (EST_BU422978.1)

DEGKIQDAAKTRREKENGEFYELAKLLPLPSAITSQLDKASIIRLTTSYLKMRA

>NPAS3 (XP_421232.2)

RKEKSRDAARSRRGKENFEFYELAKLLPLPAAITSQLDKASIIRLTISYLKMRD

>Hif1a (NP_989628.1)

RKEKSRDAARCRRSKESEVFYELAHQLPLPHTVSAHLDKASIMRLTISYLRMRK

>EPAS1 (NP_990138.1)

RKEKSRDAARCRRSKETEVFYELAHELPLPHNVSSHLDKASIMRLAISFLRTHK

>Id1 (NP_989921.1)

SRLRALVPTLPRHRRVSKVELLQHVIDYIWDLQ

>Id2 (NP_990333.1)

SKLKELVPSIPQNKKVSKMEILQHVIDYILDLQ

>Id3 (NP_989920.1)

SKLRELVPGIPQGTKLSQVEILQHVIDYIFDLQ

>Id4 (NP_989613.1)

SRLRRLVPTIPPNKRVSKVEILQHVIDYILDLQ

>Herp1a (XP_425926.2)

RKRRRGIIEKRRRDRINNSLSELRRLVPSAFEKQGSAKLEKAEILQMTVDHLKMLH

>Herp1b (EST_BU352699.1)

RKRRRGIIEKRRRDRINNSLSELRRLVPSAFEKQGSAKLEKAEILQMTVDHLKIAA

>Herp2 (XP_419754.2)

RKKRRGIIEKRRRDRINNSLSELRRLVPTAFEKQGSAKLEKAEILQMTVDHLKMLQ

>Dec1 (hmm32419)

YKLPHRLIEKKRRDRINECIAQLKDLLPEHLKLTTLGHLEKAVVLELTLKHVKALT

>Dec2 (EST_CN221710.1)

YKLPHRLIEKKRRDRINECIAQLKDLLPEHLKLTTLGHLEKAVVLELTLKHLKALT

>Dec3 (XP_422641.2)

RKLRKPLIERKRRERINNCLDQLKETVVGAFHLDQSKLEKADILEMTVKHLQNIQ

>Hes1a (EST_CD215276.1)

RKSSKPIMEKRRRARINESLGQLKTLILDALKKDSSRHSKLEKADILEMTVKHLRSLQ

>Hes1b (EST_AW239653.1)

GKSSKPIMEKRRRARINESLGQLKMLILDALKKDSSRHSKLEKADILEMTVKHLRNLQ

>Hes1c (EST_CV892644.1)

AESSKPIMEKRRRARINESLGQLKMLILDALKKDSSRHSKLEKADILEMTVKHLRNLQ

>Hes1d (EST_BG710753.1)

PQSSKPIMEKRRRARINESLGQLKMLILDALKKDSSRHSKLEKADILEMTVKHLRNLQ

>Hes5a (NP_001012713.1)

NRLRKPIVEKLRRDRINSSIEQLKLLLEKEFQRHQPNSKLEKADILEMTVSYLKYSR

>Hes5b (XP_417552.2)

NKLRKPVVEKMRRDRINSSIEQLKLLLEKEFQRHQPNSKLEKADILEMAVSYLKQQS

>Hes5c (XP_417553.2)

NKLRKPVVEKMRRDRINSSIEQLKLLLEKEFQRHQPNSKLEKADVLEVAVSYLKQQS

>Hes6 (EST_CD215895.1)

RRARKPLVEKKRRARINESLRELRRLLAGGEAKLENAEVLELTVRRVQAVL

>EBF1 (NP_990083.1)

GRFIYTALNEPTIDYGFQRLQKVIPRHPGDPERLPKEVILKRAADLVEALY

>EBF2 (XP_417675.2)

GRFIYTALNEPTIDYGFQRLQKVIPRHPGDPERLAKEMLLKRAADLVEALY

>EBF3 (XP_421824.2)

GRFVYTALNEPTIDYGFQRLQKVIPRHPGDPERLPKEVLLKRAADLVEALY

>Orphan1 (XP_001235101.1)

RRMAANVRERKRILDYNQAFNALRLVLKHDLGGKRLSKIATLRRAIHRIAALS
